# Supplementary material for: Synthesis, magnetic properties, and electronic spectra of mixed ligand bis(β-diketonato)chromium(iii) complexes with a chelated nitronyl nitroxide radical: X-ray structure of [Cr(dpm)2(NIT2py)]PF6
Source: Royal Society of Chemistry journal article supplement (doi:10.1039/b104092h), 2002-01-01
Supplement: b104092h.pdf [file b104092h.pdf]

Figure 10s

dbm

Figure 10s-17s

Absorption spectra of complex(2)-(9) in CH<sub>3</sub>CN at room temperature.

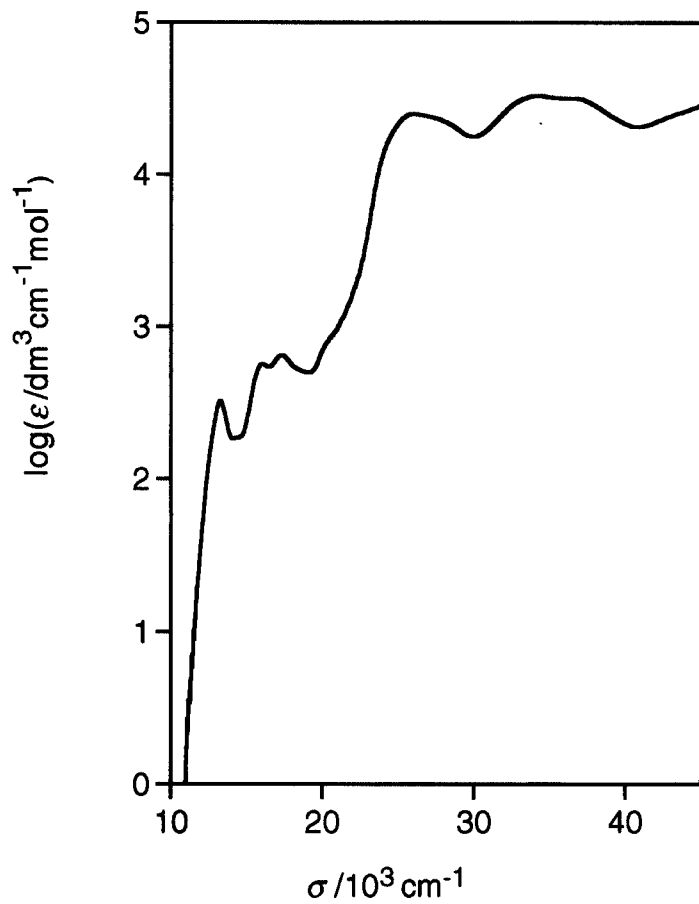

Kaizaki

Figure 11s

bzac

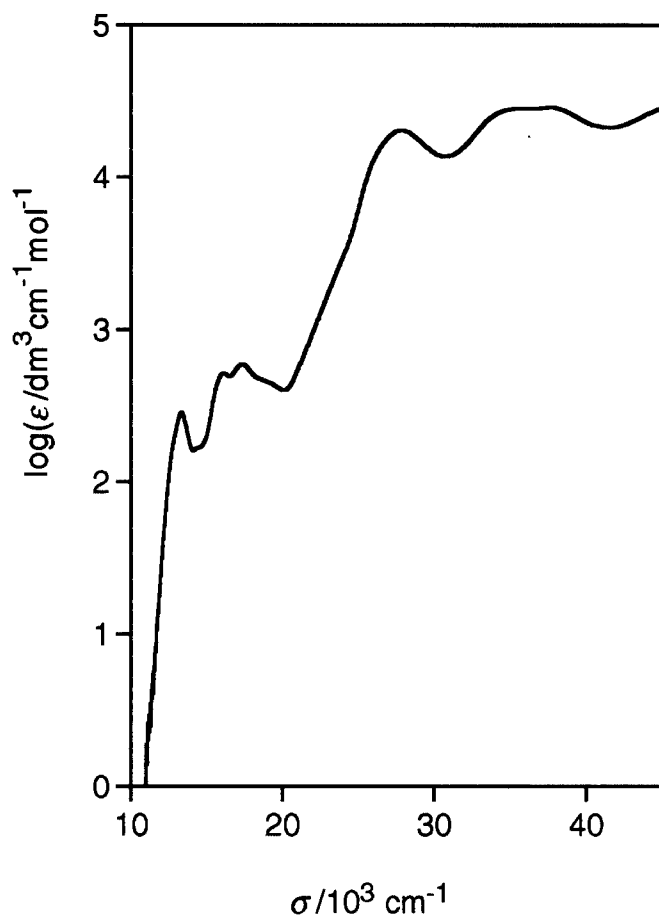

Kaizaki

Figure 12s

acaMe

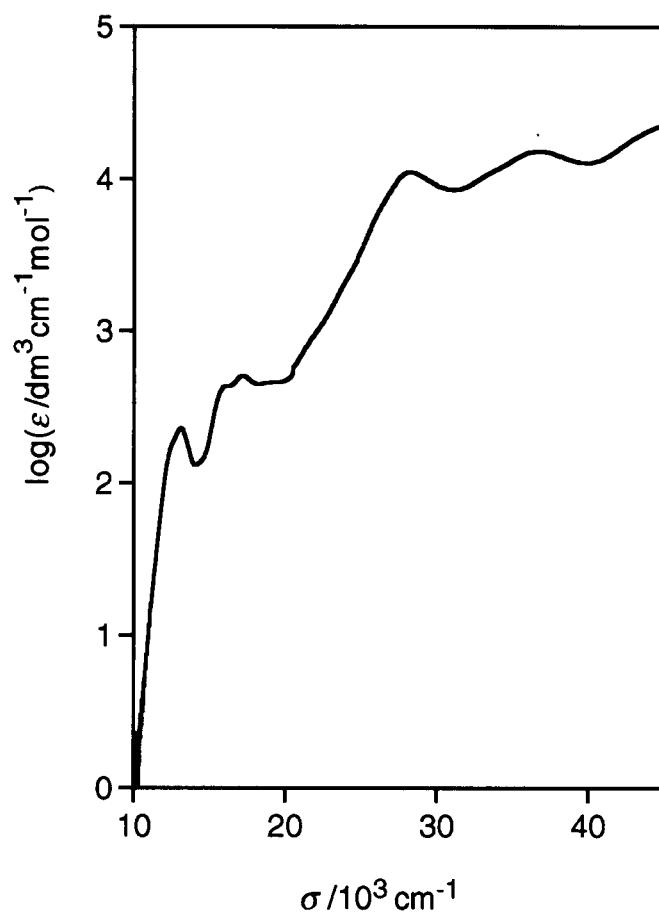

Kaizaki

Figure 13s

acaEt

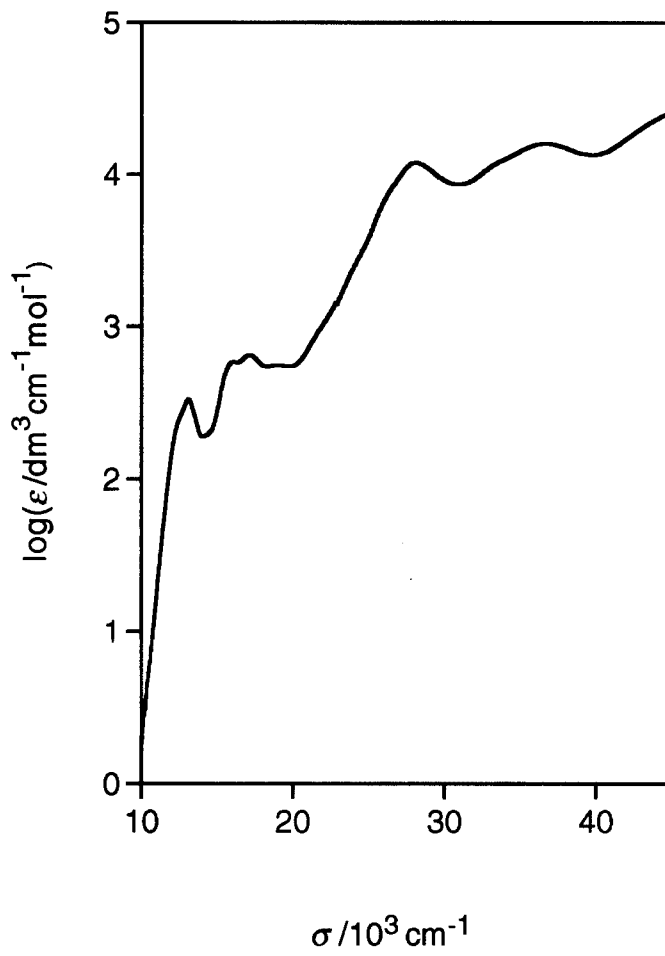

Kaizaki

Figure 14s

aca<sup>11</sup>Bu

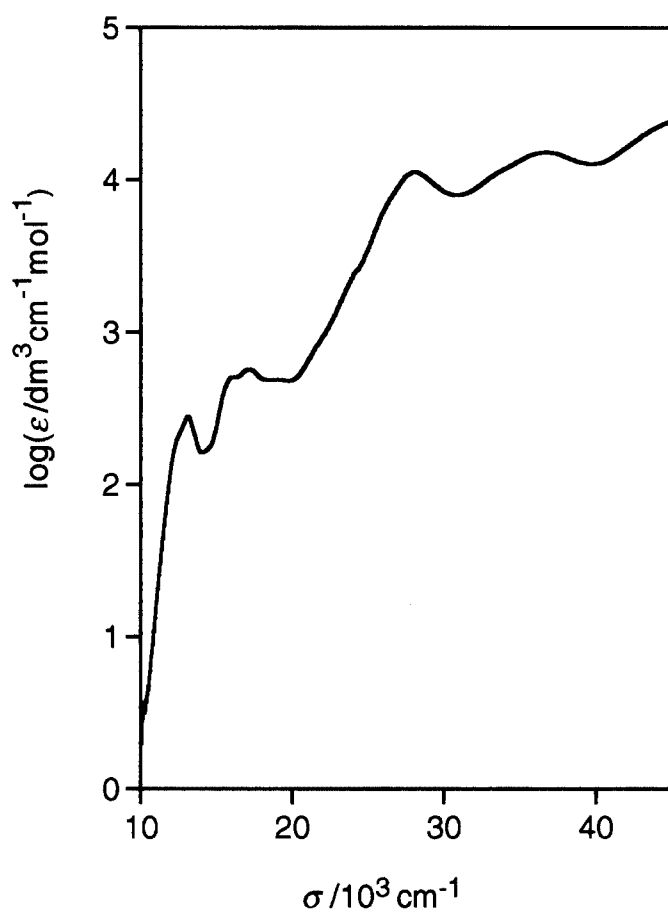

Kaizaki

Figure 15s

acaPh

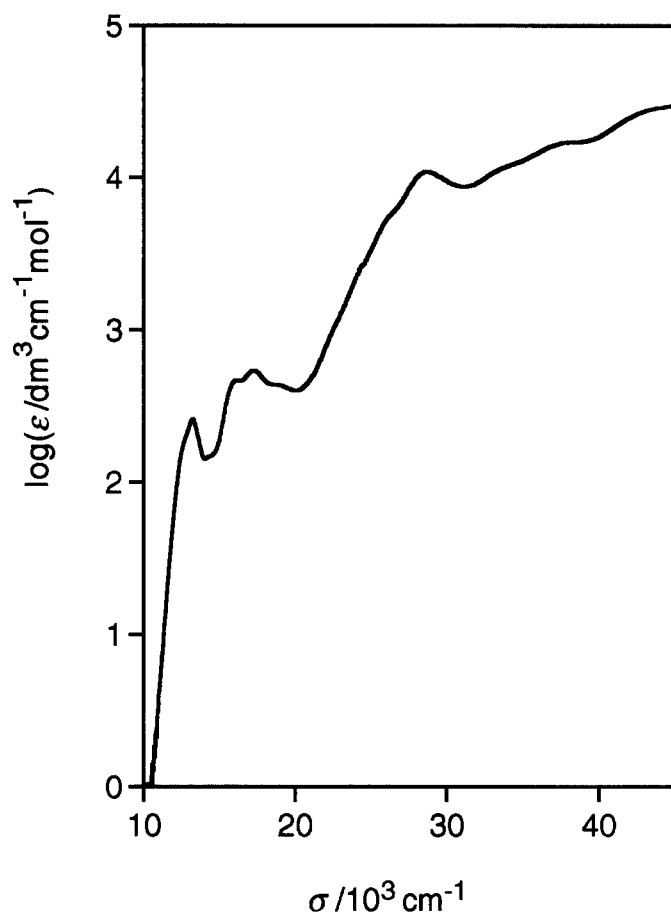

Kaizaki

Figure 16s

dpm

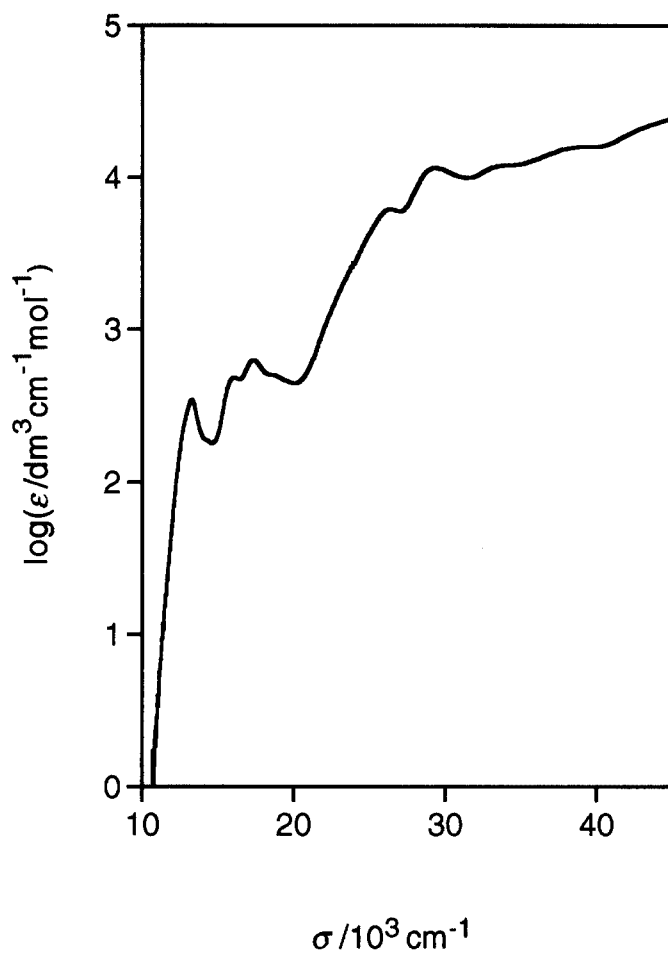

Kaizaki

Figure 17s

Mehp

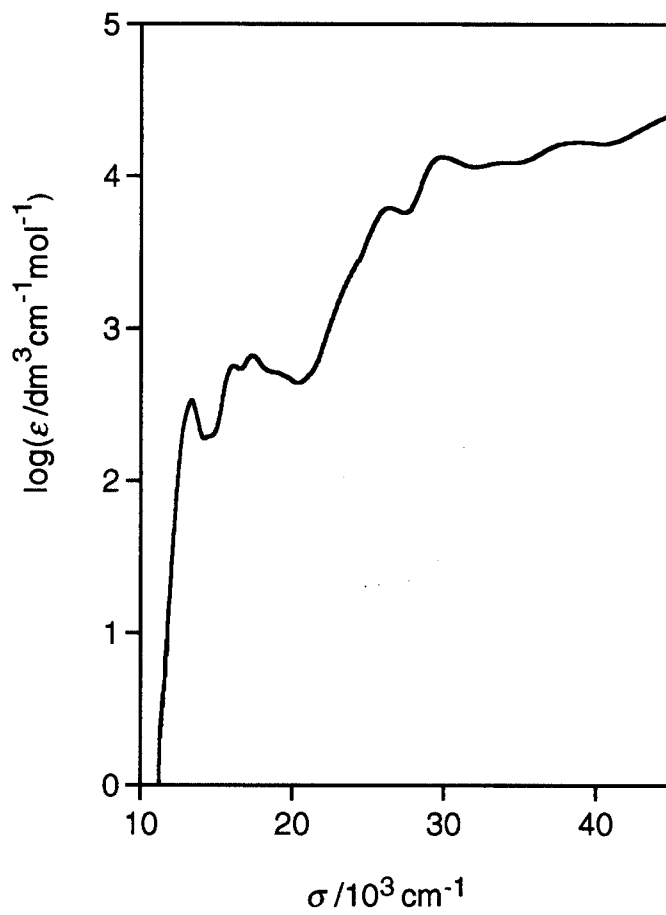

Kaizaki



acaPh

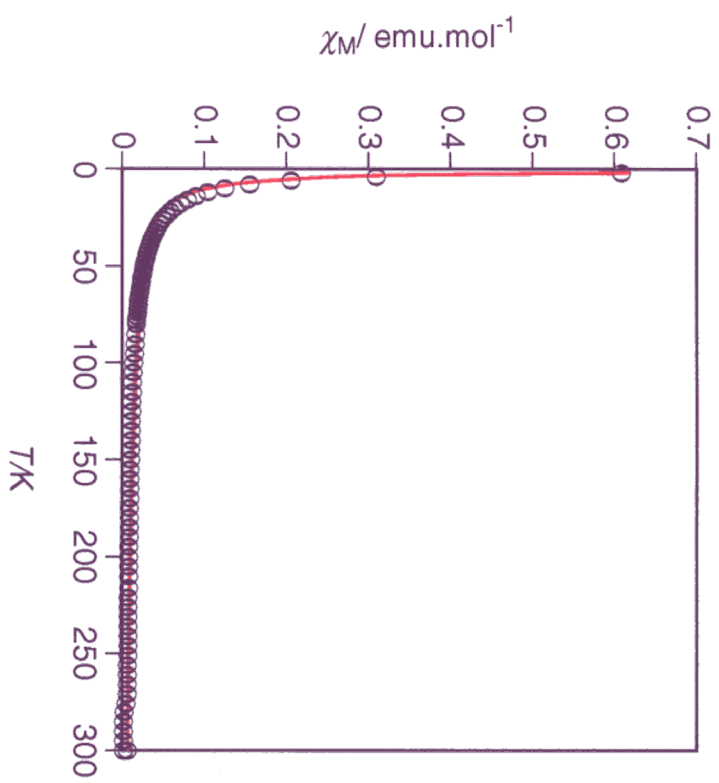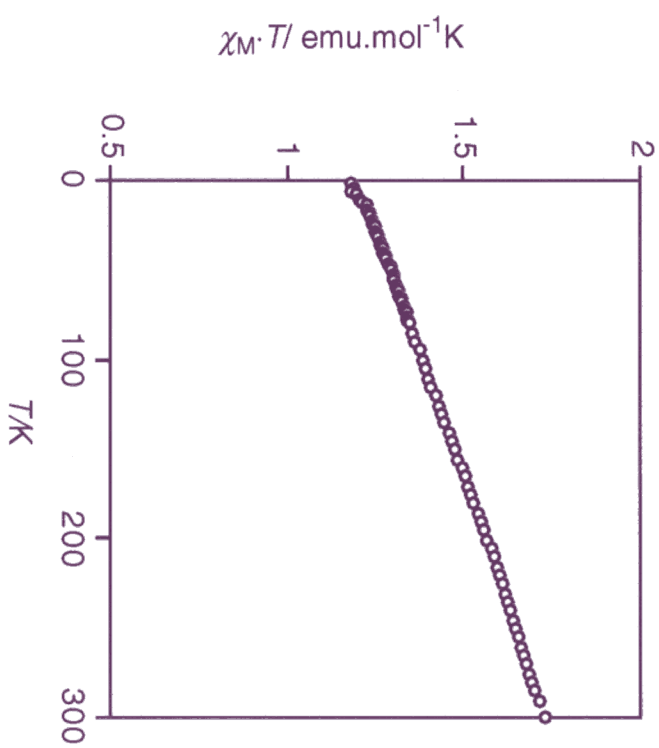

Kaizaki

bzac

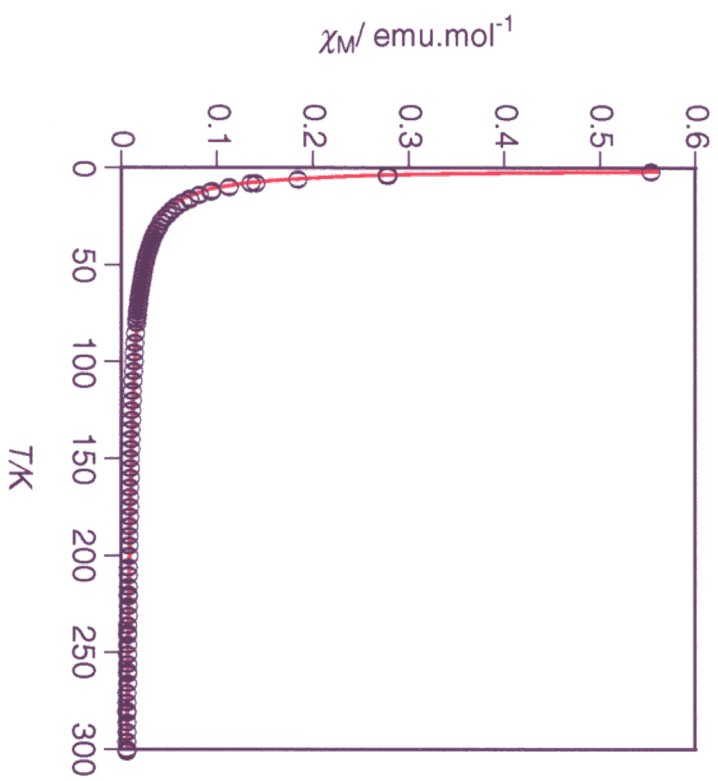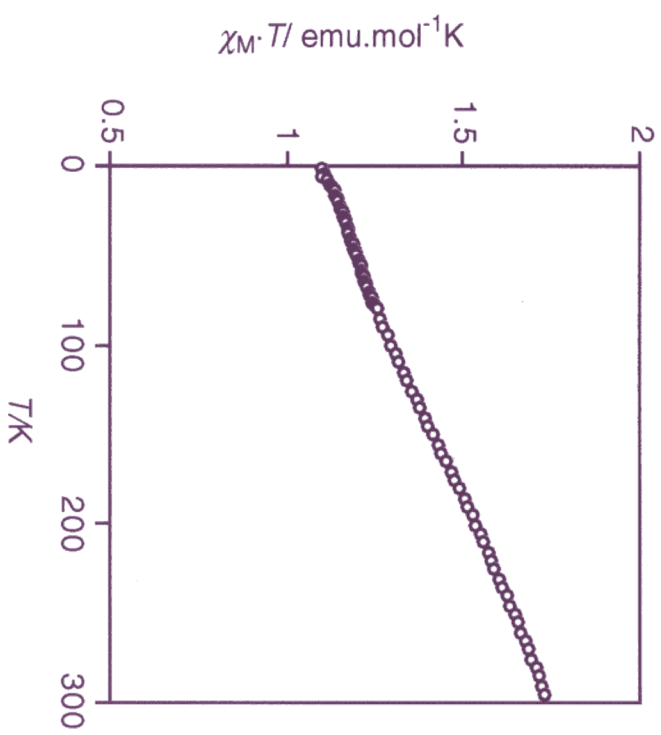

Kaizaki

dbm

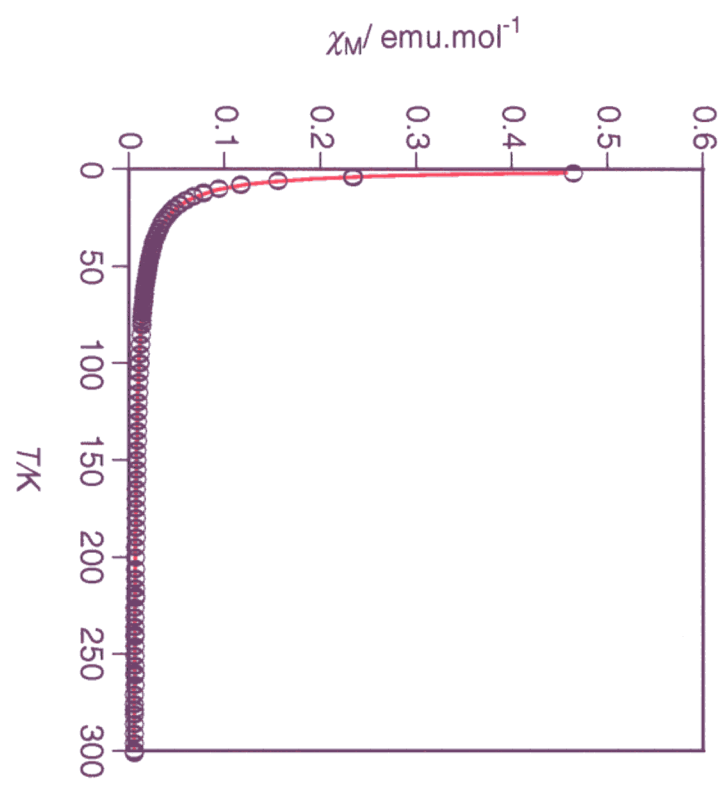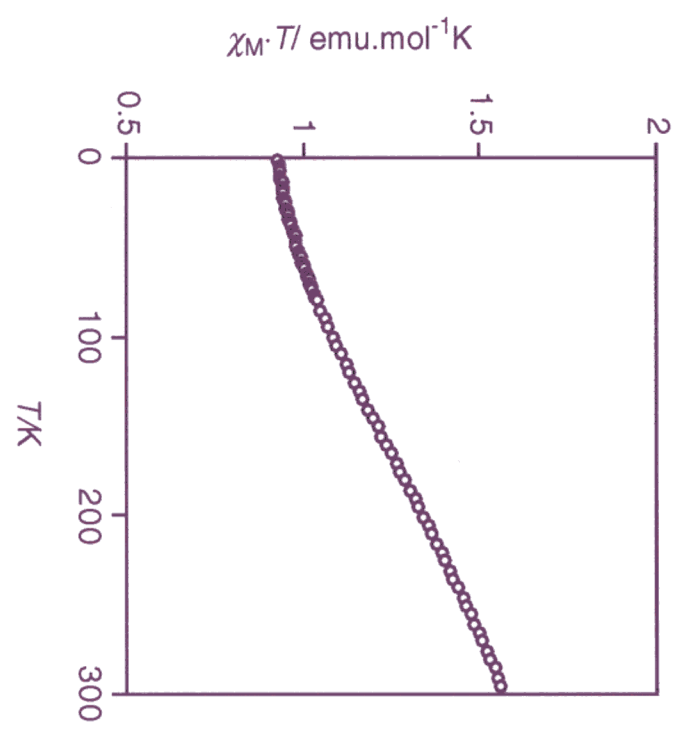

Kaizaki

dbm

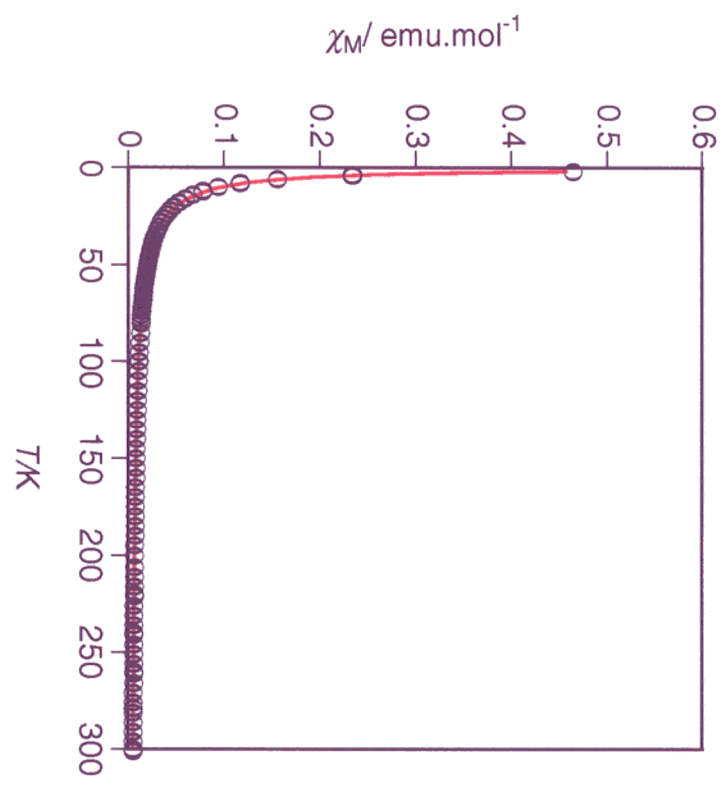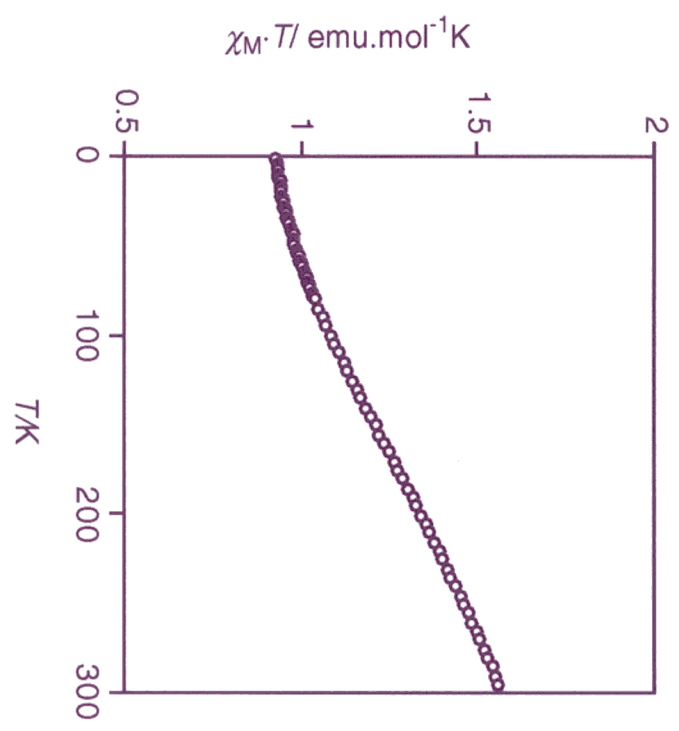

Kaizaki

dpm

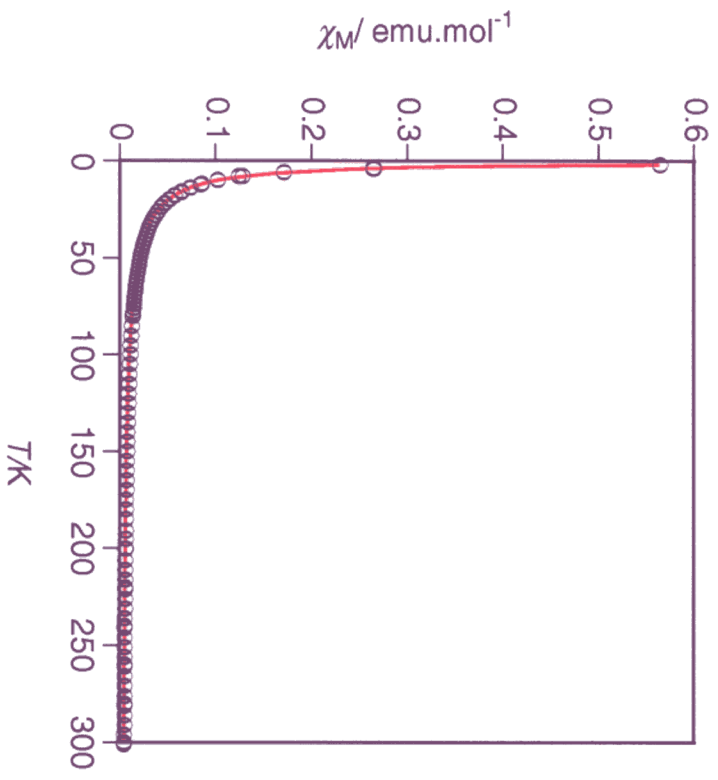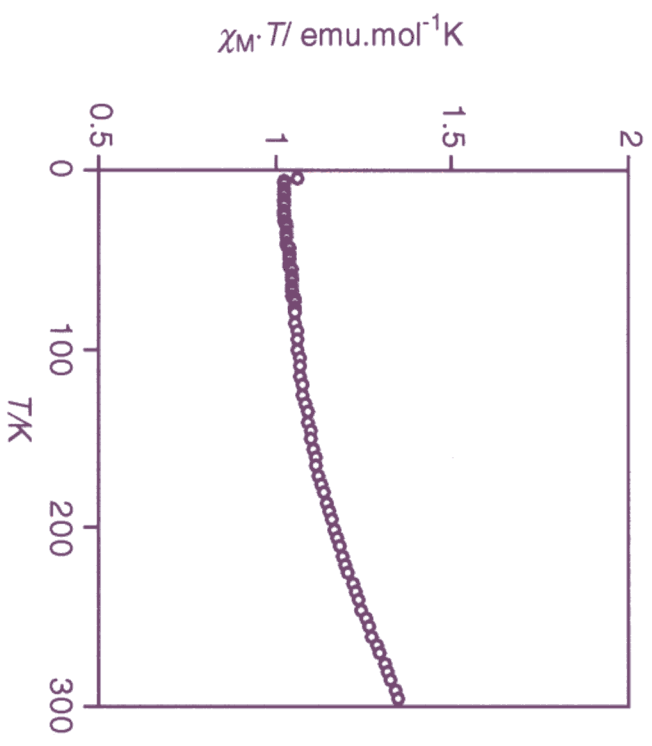

Kaizaki

dpm



Kaizaki

ACAC

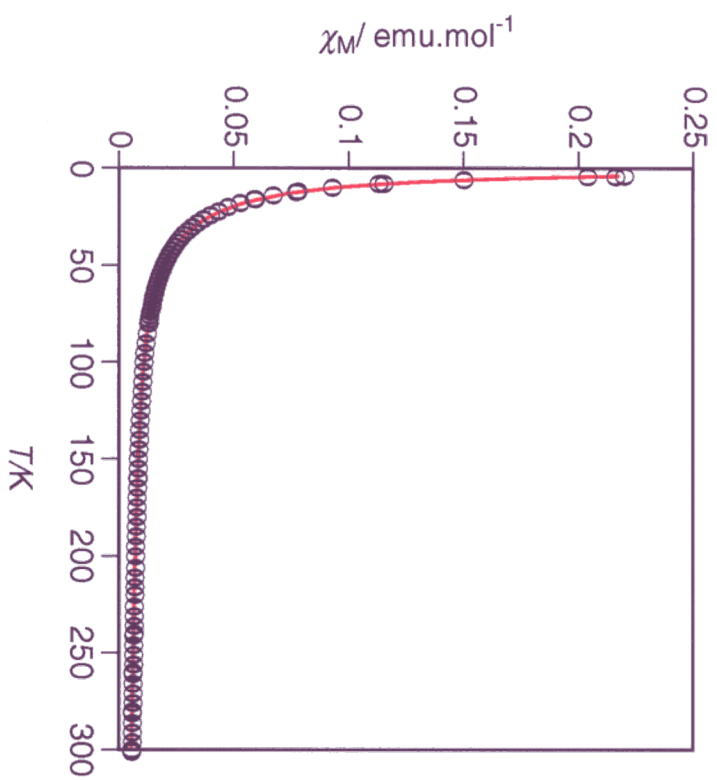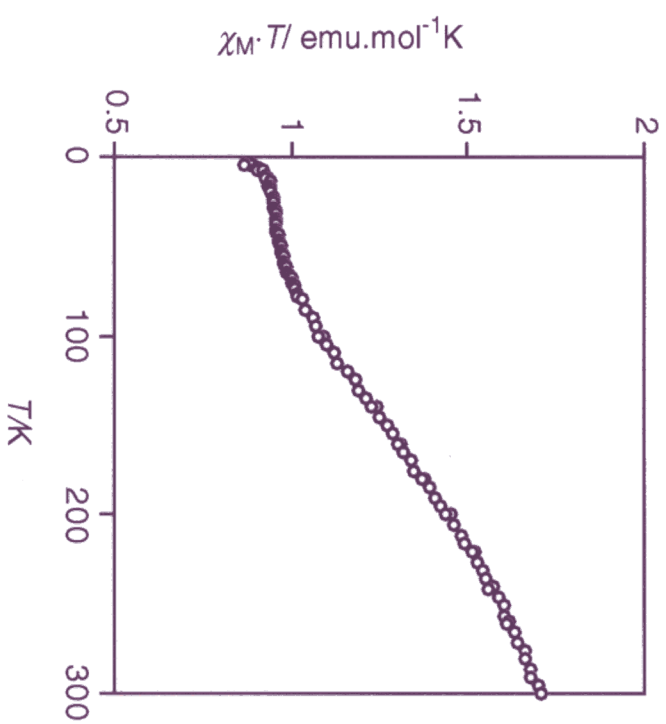

Kaizaki

acaMe

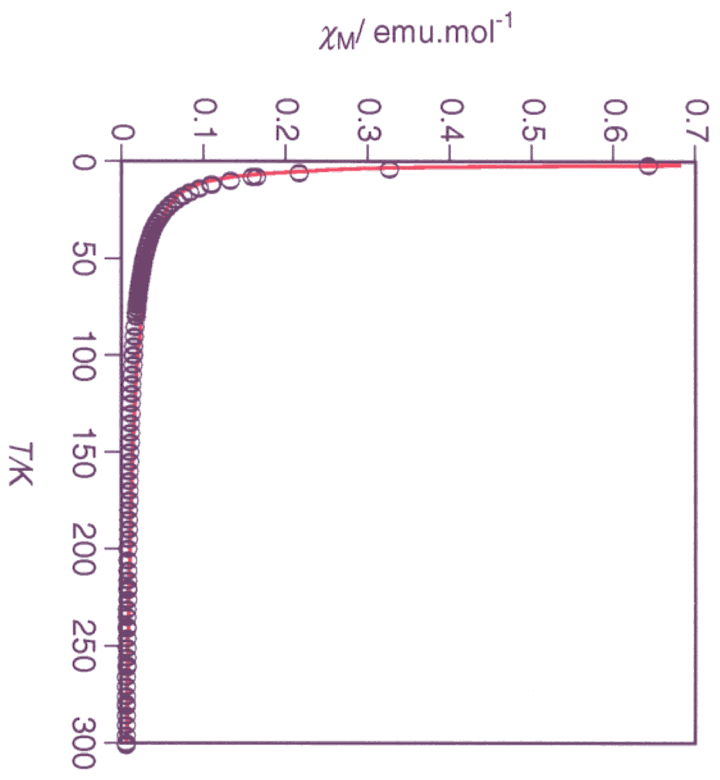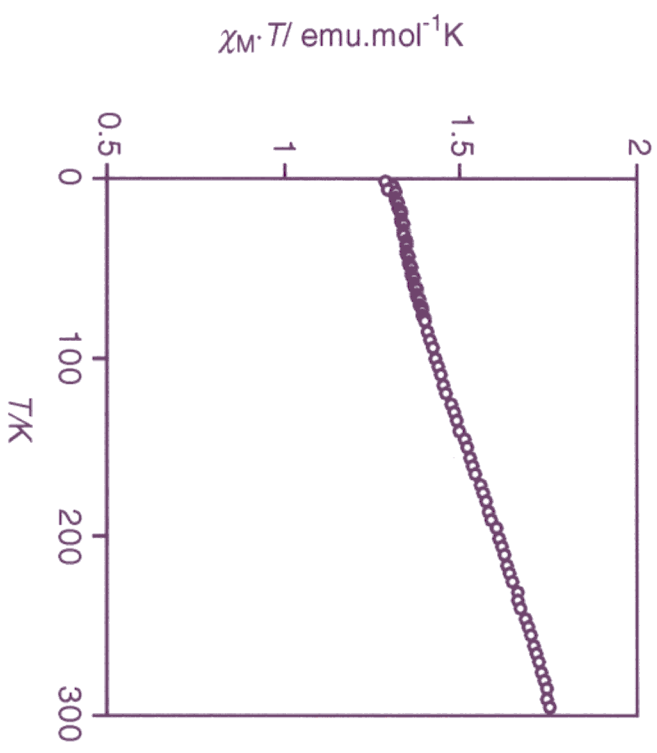

Kaizaki



acaMe



Kaizaki

aca<sup>n</sup>Bu

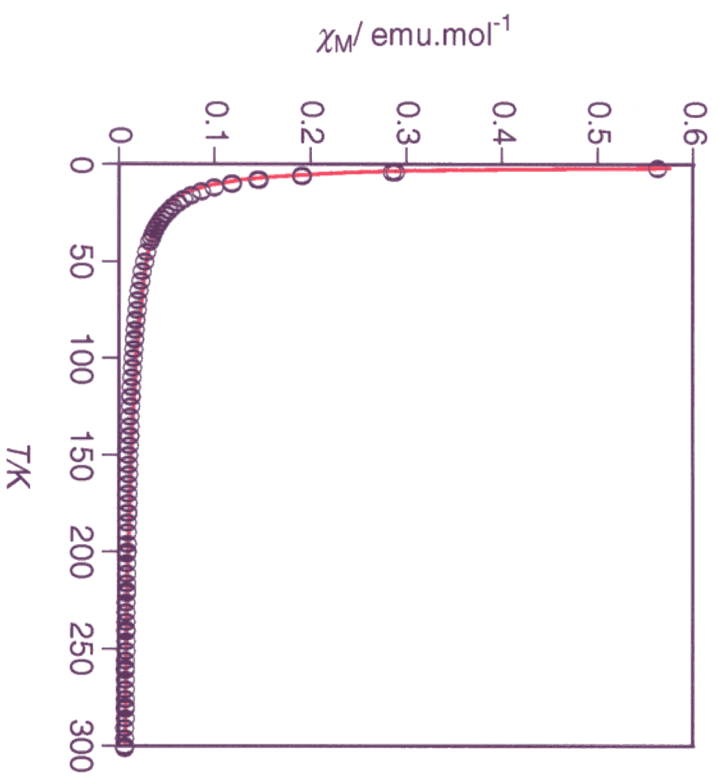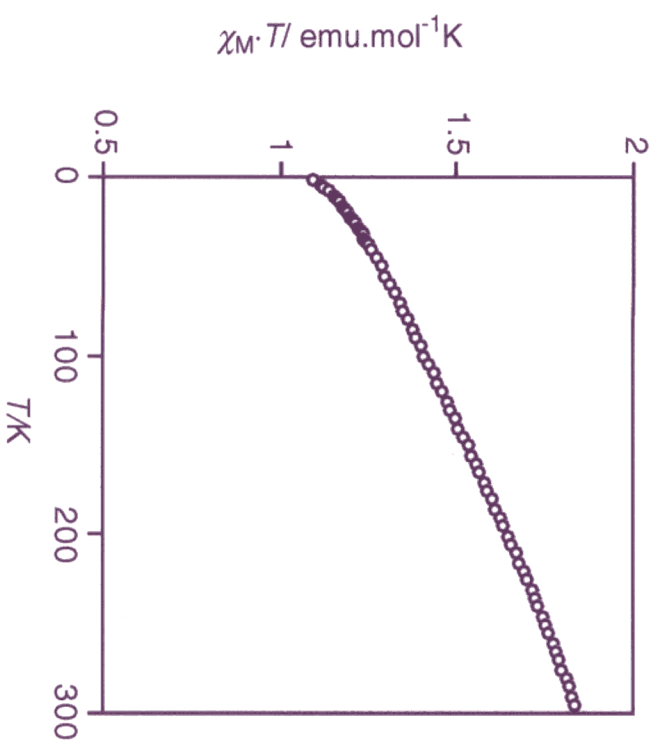

Kaizaki
